# Supplementary material for: Identification and characterization of early photoreceptor cis-regulatory elements and their relation to Onecut1
Source: PubMed Central journal article supplement (PMC6251108; doi:10.1186/s13064-018-0121-x), 2018-11-22

# Additional file 9

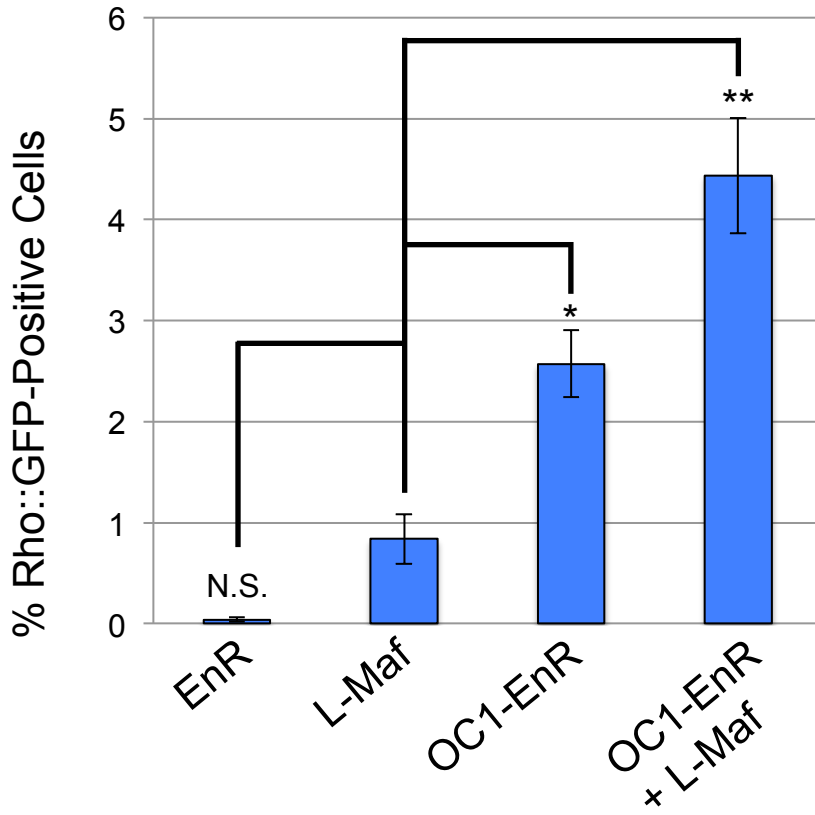

Supplement: 13064_2018_121_MOESM9_ESM.pdf [file 13064_2018_121_MOESM9_ESM.pdf]
